# Supplementary material
Source: ML conference proceedings conference paper supplement (https://openreview.net/forum?id=JX6UloWrmE)
Supplement: supplementary_material [file attachment]

**Algorithm 1** Subtask Decomposition and Virtual Training (SDVT)

---

**Initialize** Encoder  $q_\phi$ , decoder  $p_\theta$ , policy  $\pi_\psi$ , set of training tasks  $\mathcal{M}_{\text{train}}$ , virtual ratio  $p_v$ , GMVAE buffer  $\mathcal{B}_{\text{VAE}}$ , policy buffer  $\mathcal{B}_{\text{pol}}$ , total number of meta-episodes to train on  $n_{\text{meta}}$ , number of rollout episodes per meta-episode  $n_{\text{roll}}$ , running mean of subtask composition  $\bar{y}$ .

**for** meta-episode  $k = 0, \dots, n_{\text{meta}} - 1$  **do**

  Sample a training task  $M_k \sim p(\mathcal{M}_{\text{train}})$

  Sample a virtual meta-episode flag  $V \sim \text{Bernoulli}(p_v)$

**if**  $V = 1$  **then**

    Sample an imaginary subtask composition  $\tilde{y} \sim \text{Dirichlet}(\bar{y})$

**end if**

  Reset  $h_0, y_0, \mathcal{B}_{\text{pol}}$

**for** timestep  $t = 0, \dots, n_{\text{roll}} \times H - 1$  **do**

**if**  $t \bmod H = 0$  **then**

      Reset rollout episode  $s_t \sim T_{0,k}(\cdot)$

**end if**

    Sample an action  $a_t \sim \pi_\psi(\cdot | s_t, \mu_{\phi_z}(h_t, y_t), \sigma_{\phi_z}(h_t, y_t), \omega_{\phi_y}(h_t))$

    Take an environment step

$s_{t+1} \sim T_k(\cdot | s_t, a_t)$

$r_{t+1} \leftarrow R_k(s_t, a_t, s_{t+1})$

**if**  $V = 1$  **then**

$\tilde{z}_t \sim \mathcal{N}(\mu_{\phi_z}(h_t, \tilde{y}), \sigma_{\phi_z}^2(h_t, \tilde{y}))$

$\hat{h}_t = p_{\theta_{\hat{h}}}(\tilde{z}_t)$

$\tilde{r}_{t+1} \sim p_{\theta_R}(\cdot | \text{DO}[s_t, a_t, s_{t+1}], \hat{h}_t)$

      Replace  $r_{t+1} \leftarrow \tilde{r}_{t+1}$

**else**

      Add the transition  $(s_t, a_t, s_{t+1}, r_{t+1})$  to  $\mathcal{B}_{\text{VAE}}$   $\cdots$  VAE NOT TRAINED WITH VIRTUAL DYNAMICS

**end if**

    Add the transition  $(s_t, a_t, s_{t+1}, r_{t+1})$  to  $\mathcal{B}_{\text{pol}}$

    Update hidden embedding  $h_{t+1} = q_{\phi_h}(\tau_{t+1})$

    Update subtask composition  $y_{t+1} \sim \text{Cat}(\omega_{\phi_y}(h_{t+1}))$

    Update the running mean of subtask composition  $\bar{y} \leftarrow \text{RunningMeanUpdate}(\bar{y}, y_{t+1})$

**end for**

  Update GMVAE  $\{\phi, \theta\} \leftarrow \{\phi, \theta\} + \nabla_{\{\phi, \theta\}} \sum_{t=0}^{H+} \text{ELBO}_t$  with samples from  $\mathcal{B}_{\text{VAE}}$

  Update policy  $\psi \leftarrow \psi + \nabla_\psi \mathcal{J}_{\text{pol}}^+$  with samples from  $\mathcal{B}_{\text{pol}}$

  Anneal virtual ratio  $p_v \leftarrow p_v + \Delta p_v$

**end for**

---

525 **B ELBO Derivation**

526 The GMVAE's ELBO objective is derived as follows.

$$\begin{aligned}
\mathbb{E}_{d(M_k, \tau_{:H+})} [\log p_\theta(\tau_{:H+})] &= \mathbb{E}_{d(M_k, \tau_{:H+})} \left[ \log \mathbb{E}_{q_\phi(y_t, z_t | h_t)} \left[ \frac{p_\theta(\tau_{:H+}, y_t, z_t)}{q_\phi(y_t, z_t | h_t)} \right] \right] \\
&\geq \mathbb{E}_{d(M_k, \tau_{:H+})} \left[ \mathbb{E}_{q_\phi(y_t, z_t | h_t)} \left[ \log \frac{p_\theta(\tau_{:H+}, y_t, z_t)}{q_\phi(y_t, z_t | h_t)} \right] \right] \\
&= \mathbb{E}_{d(M_k, \tau_{:H+})} \left[ \mathbb{E}_{q_\phi(y_t, z_t | h_t)} \left[ \log \frac{p_\theta(\tau_{:H+} | y_t, z_t) p_\theta(z_t | y_t) p(y_t)}{q_\phi(y_t | h_t) q_\phi(z_t | h_t, y_t)} \right] \right] \\
&= \mathbb{E}_{d(M_k, \tau_{:H+})} \left[ \mathbb{E}_{q_\phi(y_t, z_t | h_t)} \left[ \log p_\theta(\tau_{:H+} | z_t) + \frac{p_\theta(z_t | y_t)}{q_\phi(z_t | h_t, y_t)} + \log \frac{p(y_t)}{q_\phi(y_t | h_t)} \right] \right]. \tag{8}
\end{aligned}$$

527 Eq. (8) is equivalent to the ELBO objective in Eq. (3) without weighting coefficients. We assume  
528 that the reconstruction  $\tau_{:H+}$  is conditionally independent of the subtask composition  $y_t$  given  $z_t$ .

## C Implementation Details

### C.1 Reference Implementations

**MAML, RL<sup>2</sup>, and PEARL** To replicate the results of MAML [12], RL<sup>2</sup> [8], and PEARL [44] as reported in the Meta-World paper [69], we utilize the exact version<sup>2</sup> of the Garage repository [14] without any modifications. For their hyperparameters, please refer to Appendix D.7, D.8, and D.9 of the Meta-World paper. MAML is the only baseline that has the advantage to take gradient updates during the test.

**SDVT, SD, LDM, VariBAD** Task-inference-based methods (SDVT, SD, LDM [33], and VariBAD [72]) are adapted to the Meta-World benchmark based on the VariBAD’s implementation.<sup>3</sup> We begin with VariBAD’s hyperparameter configuration for MuJoCo [56] Ant-goal and modify certain hyperparameters to accommodate the Meta-World benchmark (e.g., batch size, network capacity, etc.). In line with VariBAD and LDM, we train SDVT’s policy using PPO [47]. The GMVAE is based on an implementation<sup>4</sup> that employs the Gumbel-Softmax reparameterization trick [22] when sampling the categorical subtask variable. The virtual training processes of SDVT and LDM require agent-environment interaction since they use states from the real environment. Therefore, the virtual training steps are also added when counting the total number of training steps. For a comprehensive list of SDVT hyperparameters, shared among SD, LDM, and VariBAD to ensure a fair comparison, please refer to Appendix C.3 and the supplementary material’s source code.

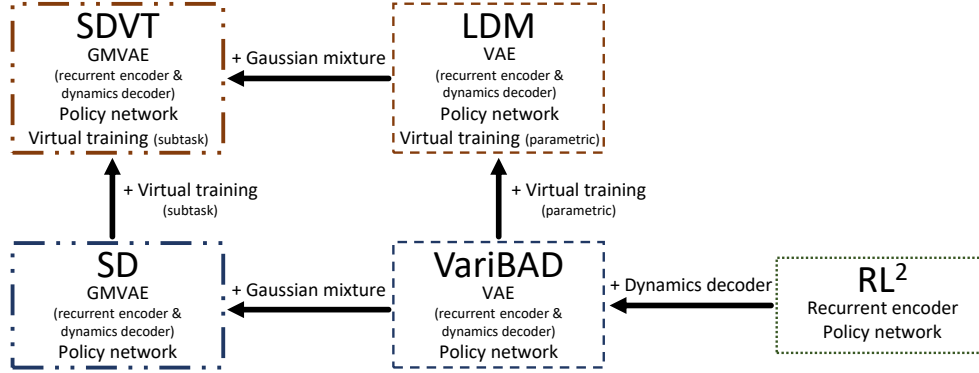

Figure 5: **Schematic overview of algorithms.** SDVT without a Gaussian mixture reduces to LDM, LDM without virtual training reduces to VariBAD, and VariBAD without a VAE decoder reduces to RL<sup>2</sup>. MAML and PEARL use fully connected networks.

### C.2 Computational Complexity

Table 2: **Computational complexity.** The total wall-clock time required to generate the results for the ML-10, averaged across all eight random seeds.

|                         | SDVT | SDVT-LW | SD  | SD-LW | RL <sup>2</sup> | MAML | PEARL | VariBAD | LDM |
|-------------------------|------|---------|-----|-------|-----------------|------|-------|---------|-----|
| Wall-clock time (hours) | 142  | 140     | 138 | 135   | 192             | 17   | 258   | 126     | 131 |

Our experiments were conducted using an Nvidia TITAN Xp. Due to the considerably larger variety of tasks compared to standard meta-RL benchmarks, non-parametric benchmarks require significantly more computational resources and time. In Table 2, we detail the total wall-clock time expended by our methods and baselines during the training and evaluation of the ML-10 benchmark. This time includes the environmental interaction time for 250M training steps, roughly 100M steps dedicated to evaluations, and the time taken to train the neural networks. Despite incorporating the GMVAE and virtual training, our method’s computational demand does not substantially surpass that of VariBAD.

<sup>2</sup><https://github.com/rlworkgroup/garage/pull/2287>

<sup>3</sup><https://github.com/lmzintgraf/varibad>

<sup>4</sup><https://github.com/jariasf/GMVAE>

Table 3: **Hyperparameters of SDVT and SD.** Hyperparameters of SDVT used for Meta-World ML-10 and ML-45 along with the notations in the manuscript and the argument names in the source code. SD shares the same hyperparameters except without those of virtual training. Different hyperparameters of our lightweight variant are denoted as (-LW).

| Category         | Description                        | Notation                                                   | Value (ML-10, 45) | Argument Name           |
|------------------|------------------------------------|------------------------------------------------------------|-------------------|-------------------------|
| General          | Rollout episode horizon            | $H$                                                        | 500               | max_episode_steps       |
|                  | Number of rollout episodes         | $n_{\text{roll}}$                                          | 10                | max_rollouts_per_task   |
|                  | Discount factor                    | $\gamma$                                                   | 0.99              | policy_gamma            |
|                  | Number of parallel processes       |                                                            | 10                | num_processes           |
|                  | Total Environment Steps            |                                                            | 2.5e8, 4.0e8      | num_frames              |
| GMVAE            | Optimizer                          |                                                            | Adam              | optimiser_vae           |
|                  | Learning rate                      |                                                            | $1e-3$            | lr_vae                  |
|                  | Subsample ELBO                     |                                                            | 100               | vae_subsample_elbos     |
|                  | Subsample decodes                  |                                                            | 100               | vae_subsample_decodes   |
|                  | Buffer size (meta-episodes)        | $ \mathcal{B}_{\text{VAE}} $                               | 1000              | size_vae_buffer         |
|                  | ELBO categorical coefficient       | $\alpha_c$                                                 | 1.0               | cat_loss_coeff          |
|                  | ELBO categorical coefficient (-LW) | $\alpha_c$                                                 | 0.5               | cat_loss_coeff          |
|                  | ELBO Gaussian coefficient          | $\alpha_g$                                                 | 1.0               | gauss_loss_coeff        |
|                  | ELBO reward coefficient            | $\alpha_R$                                                 | 10                | rew_loss_coeff          |
|                  | ELBO transition coefficient        | $\alpha_T$                                                 | 1000              | state_loss_coeff        |
|                  | ELBO occupancy coefficient         | $\alpha_o$                                                 | 1.0               | occ_loss_coeff          |
|                  | ELBO occupancy coefficient (-LW)   | $\alpha_o$                                                 | 0                 | occ_loss_coeff          |
|                  | Gumbel softmax temperature         |                                                            | 1                 | gumbel_temperature      |
|                  | Number of updates per epoch        |                                                            | 10, 20            | num_vae_updates         |
|                  | Subtask dimension                  | $K = N_{\text{train}}$                                     | 10, 45            | vae_mixture_num         |
|                  | Subtask dimension (-LW)            | $K$                                                        | 5                 | vae_mixture_num         |
|                  | Gaussian dimension                 | $\dim(z)$                                                  | 5, 10             | latent_dim              |
|                  | Dropout rate                       | $p_{\text{drop}}$                                          | 0.7               | dropout_rate            |
|                  | Reward reconstruction objective    |                                                            | MSE               | rew_pred_type           |
|                  | State reconstruction objective     |                                                            | MSE               | state_pred_type         |
| Policy           | Algorithm                          |                                                            | PPO               | policy                  |
|                  | Optimiser                          |                                                            | Adam              | policy_optimiser        |
|                  | Learning rate                      |                                                            | $7e-4$            | lr_policy               |
|                  | Optimizer epsilon                  |                                                            | $10e-8$           | policy_eps              |
|                  | PPO update epochs                  |                                                            | 5                 | ppo_num_epochs          |
|                  | Steps per policy update            | $\frac{ \mathcal{B}_{\text{pol}} }{\text{num\_processes}}$ | 5000              | policy_num_steps        |
|                  | Number of minibatches              |                                                            | 10                | ppo_num_minibatch       |
|                  | PPO clipping parameter             |                                                            | 0.1               | ppo_clip_param          |
|                  | GAE $\lambda$                      |                                                            | 0.9               | policy_tau              |
|                  | Initial standard deviation         |                                                            | 1.0               | policy_init_std         |
|                  | Minimum standard deviation         |                                                            | 0.5               | policy_min_std          |
|                  | Maximum standard deviation         |                                                            | 1.5               | policy_max_std          |
| Virtual training | Entropy coefficient                |                                                            | $1e-3$            | policy_entropy_coef     |
|                  | Initial virtual ratio              |                                                            | 0.0               | virtual_ratio           |
|                  | Virtual ratio increment per step   | $\Delta p_v$                                               | $5e-8, 2.5e-8$    | virtual_ratio_increment |
|                  | ELBO dispersion coefficient        | $\alpha_d$                                                 | 10                | ext_loss_coeff          |

Table 4: **Hyperparameters of VariBAD and LDM.** VariBAD and LDM employ identical hyperparameters for the general and policy categories of SDVT and SD, as shown in Table 3. The sole distinction lies in the structural variation resulting from the utilization of GMVAE and VAE. We choose the Gaussian dimension that yielded the most favorable outcomes among 5, 10, 15, and 20.

| Category | Description                     | Notation                     | Value (ML-10, 45) | Argument Name         |
|----------|---------------------------------|------------------------------|-------------------|-----------------------|
| VAE      | Optimizer                       |                              | Adam              | optimiser_vae         |
|          | Learning rate                   |                              | $1e-3$            | lr_vae                |
|          | Subsample ELBO                  |                              | 100               | vae_subsample_elbos   |
|          | Subsample decodes               |                              | 100               | vae_subsample_decodes |
|          | Buffer size (meta-episodes)     | $ \mathcal{B}_{\text{VAE}} $ | 1000              | size_vae_buffer       |
|          | ELBO KL coefficient             |                              | 0.1               | kl_weight             |
|          | ELBO reward coefficient         | $\alpha_R$                   | 10                | rew_loss_coeff        |
|          | ELBO transition coefficient     | $\alpha_T$                   | 1000              | state_loss_coeff      |
|          | Number of updates per epoch     |                              | 10, 20            | num_vae_updates       |
|          | Gaussian dimension              | $\dim(z)$                    | 5, 10             | latent_dim            |
|          | Dropout rate (VariBAD)          | $p_{\text{drop}}$            | 0.0               | dropout_rate          |
|          | Dropout rate (LDM)              | $p_{\text{drop}}$            | 0.7               | dropout_rate          |
|          | Reward reconstruction objective |                              | MSE               | rew_pred_type         |
|          | State reconstruction objective  |                              | MSE               | state_pred_type       |

#### 556 C.4 Network Architecture

557 The network architectures comprising our method are described in Table 5. Prior to being input into  
558 the encoder or decoder, all state, action, and reward inputs pass through embedding networks. The  
559 values of  $K = \dim(y)$  and  $\dim(z)$  differ for the ML-10 and ML-45, as indicated in Table 3.

Table 5: **Network architecture.** Details of the network architecture composing the GMVAE. The numbers in the Layers column represent the dimension of the hidden layers and the output.

| Network                            | Notation                              | Architecture | Layers                 | Activations (last layer) |
|------------------------------------|---------------------------------------|--------------|------------------------|--------------------------|
| State embedding                    |                                       | MLP          | [32]                   | (Tanh)                   |
| Reward embedding                   |                                       | MLP          | [16]                   | (Tanh)                   |
| Action embedding                   |                                       | MLP          | [16]                   | (Tanh)                   |
| Recurrent encoder                  | $q_{\phi_h}$                          | GRU          | [256]                  | (None)                   |
| Categorical parameter              | $\omega_{\phi_y}$                     | MLP          | [512, 512, $K$ ]       | ReLU (Softmax)           |
| Gaussian parameters                | $\mu_{\phi_z}, \sigma_{\phi_z}^2$     | MLP          | [512, 512, $\dim(z)$ ] | ReLU (None, SoftPlus)    |
| Gaussian regularization parameters | $\mu_{\theta_z}, \sigma_{\theta_z}^2$ | MLP          | [ $\dim(z)$ ]          | (None, SoftPlus)         |
| Latent context dispersion          | $p_{\theta_{\hat{h}}}$                | MLP          | [256, 256, 256]        | ReLU (None)              |
| Reward decoder                     | $p_{\theta_R}$                        | MLP          | [64, 64, 32, 1]        | ReLU (None)              |
| Transition decoder                 | $p_{\theta_T}$                        | MLP          | [64, 64, 32, 40]       | ReLU (None)              |
| Policy                             | $\pi_{\psi}$                          | MLP          | [256, 256, 4]          | Tanh (Tanh)              |

#### 560 C.5 Aggregation method for the Success Rate

561 The main results in the Meta-World paper (Table 1 and Figure 6 of Yu et al. [69]) present the average  
562 of the *maximum* success rate for each task, diverging from the raw scores in their Figure 17 and  
563 18. For instance, if an agent achieves a 90% success rate on “Door-close” in one evaluation during  
564 training and scores 10% in all other evaluations at different times, the reported success rate for  
565 “Door-close” is 90%. The mean of these maximum scores across tasks is reported as the aggregated  
566 success rate.

567 This unconventional aggregation method does not accurately represent the meta-RL objective, which  
568 aims to train a single agent capable of solving multiple tasks. Meta-World calculates success rates for  
569 various tasks at distinct time points during training, even though the agent might specialize in different  
570 tasks at various stages. As a result, the agent may excel at specific tasks by chance. Consequently,  
571 evaluating the agent more frequently could yield higher *maximum* scores. We report the conventional  
572 final performance, which better reflects the meta-RL objective.

## 573 D Detailed Experimental Results

### 574 D.1 Performance on Individual Tasks

Table 6: **Meta-World V2 ML-10 success rate.** We report the final success rates (%) of baselines and our methods for training tasks and test tasks of the Meta-World ML-10 benchmark. All results are reported as the mean success rate  $\pm$  95% confidence interval of 8 seeds at 250M steps.

| Index. Task        | SDVT                            | SDVT-LW                         | SD                              | SD-LW                           | RL <sup>2</sup>                 | MAML                            | PEARL                           | VariBAD                         | LDM                             |
|--------------------|---------------------------------|---------------------------------|---------------------------------|---------------------------------|---------------------------------|---------------------------------|---------------------------------|---------------------------------|---------------------------------|
| 1. Reach           | 50.0 $\pm$ 11.0                 | 22.0 $\pm$ 3.5                  | 53.8 $\pm$ 11.5                 | 56.2 $\pm$ 9.1                  | 27.5 $\pm$ 19.8                 | 50.0 $\pm$ 34.6                 | <b>70.0<math>\pm</math>11.9</b> | 28.5 $\pm$ 5.0                  | 28.5 $\pm$ 4.1                  |
| 2. Push            | 57.5 $\pm$ 18.6                 | 25.2 $\pm$ 16.5                 | 61.2 $\pm$ 7.3                  | <b>68.8<math>\pm</math>10.6</b> | 60.0 $\pm$ 13.0                 | 0.0 $\pm$ 0.0                   | 0.0 $\pm$ 0.0                   | 25.8 $\pm$ 12.9                 | 25.5 $\pm$ 12.8                 |
| 3. Pick-place      | 47.5 $\pm$ 9.6                  | 39.0 $\pm$ 5.4                  | 52.5 $\pm$ 7.6                  | <b>55.0<math>\pm</math>13.9</b> | 42.5 $\pm$ 21.0                 | 0.0 $\pm$ 0.0                   | 0.0 $\pm$ 0.0                   | 24.8 $\pm$ 13.3                 | 27.2 $\pm$ 13.3                 |
| 4. Door-open       | <b>100.0<math>\pm</math>0.0</b> | 60.5 $\pm$ 31.9                 | <b>100.0<math>\pm</math>0.0</b> | 63.8 $\pm$ 32.5                 | 93.8 $\pm$ 9.1                  | 79.5 $\pm$ 22.1                 | 10.2 $\pm$ 11.9                 | 86.8 $\pm$ 22.7                 | 62.5 $\pm$ 33.5                 |
| 5. Drawer-close    | <b>100.0<math>\pm</math>0.0</b> | <b>100.0<math>\pm</math>0.0</b> | <b>100.0<math>\pm</math>0.0</b> | <b>100.0<math>\pm</math>0.0</b> | 98.8 $\pm$ 2.3                  | 99.5 $\pm$ 1.1                  | 86.8 $\pm$ 5.6                  | <b>100.0<math>\pm</math>0.0</b> | <b>100.0<math>\pm</math>0.0</b> |
| 6. Button-press    | 98.8 $\pm$ 2.3                  | 98.8 $\pm$ 1.8                  | 96.2 $\pm$ 6.9                  | <b>100.0<math>\pm</math>0.0</b> | 87.5 $\pm$ 8.3                  | 93.0 $\pm$ 8.3                  | 46.0 $\pm$ 11.2                 | 98.5 $\pm$ 0.9                  | 99.5 $\pm$ 0.9                  |
| 7. Peg-insert-side | 31.2 $\pm$ 13.2                 | 24.5 $\pm$ 10.2                 | <b>50.0<math>\pm</math>19.9</b> | 36.2 $\pm$ 11.5                 | 45.0 $\pm$ 21.6                 | 0.0 $\pm$ 0.0                   | 0.0 $\pm$ 0.0                   | 19.8 $\pm$ 14.0                 | 21.8 $\pm$ 15.3                 |
| 8. Window-open     | <b>100.0<math>\pm</math>0.0</b> | <b>100.0<math>\pm</math>0.0</b> | 98.8 $\pm$ 2.3                  | <b>100.0<math>\pm</math>0.0</b> | <b>100.0<math>\pm</math>0.0</b> | <b>100.0<math>\pm</math>0.0</b> | 19.2 $\pm$ 11.5                 | <b>100.0<math>\pm</math>0.0</b> | <b>100.0<math>\pm</math>0.0</b> |
| 9. Sweep           | <b>96.2<math>\pm</math>4.8</b>  | 72.2 $\pm$ 29.0                 | 83.8 $\pm$ 22.2                 | 83.8 $\pm$ 15.1                 | 75.0 $\pm$ 17.3                 | 0.0 $\pm$ 0.0                   | 0.0 $\pm$ 0.0                   | 60.2 $\pm$ 32.4                 | 61.2 $\pm$ 32.9                 |
| 10. Basketball     | <b>91.2<math>\pm</math>6.4</b>  | 78.8 $\pm$ 9.8                  | 73.8 $\pm$ 14.3                 | 91.2 $\pm$ 8.8                  | 43.8 $\pm$ 16.6                 | 0.0 $\pm$ 0.0                   | 0.0 $\pm$ 0.0                   | 37.2 $\pm$ 26.0                 | 40.5 $\pm$ 28.9                 |
| Train mean         | <b>77.2<math>\pm</math>3.0</b>  | 62.1 $\pm$ 4.1                  | 77.0 $\pm$ 5.9                  | 75.5 $\pm$ 5.5                  | 67.4 $\pm$ 4.4                  | 42.2 $\pm$ 4.5                  | 23.2 $\pm$ 1.9                  | 58.2 $\pm$ 8.9                  | 56.7 $\pm$ 12.3                 |
| 11. Drawer-open    | <b>65.0<math>\pm</math>19.9</b> | 30.5 $\pm$ 12.9                 | 48.8 $\pm$ 23.4                 | 45.0 $\pm$ 24.0                 | 2.2 $\pm$ 1.9                   | 15.8 $\pm$ 19.3                 | 1.5 $\pm$ 1.1                   | 12.8 $\pm$ 12.8                 | 21.8 $\pm$ 12.0                 |
| 12. Door-close     | 7.5 $\pm$ 9.0                   | <b>81.2<math>\pm</math>19.0</b> | 33.8 $\pm$ 25.4                 | 18.8 $\pm$ 24.1                 | 8.2 $\pm$ 7.3                   | 3.2 $\pm$ 6.0                   | 1.2 $\pm$ 1.5                   | 27.0 $\pm$ 21.8                 | 30.2 $\pm$ 28.2                 |
| 13. Shelf-place    | 0.0 $\pm$ 0.0                   | <b>1.0<math>\pm</math>1.2</b>   | 0.0 $\pm$ 0.0                   | 0.0 $\pm$ 0.0                   | 0.2 $\pm$ 0.2                   | 0.0 $\pm$ 0.0                   | 0.0 $\pm$ 0.0                   | 0.0 $\pm$ 0.0                   | 0.0 $\pm$ 0.0                   |
| 14. Sweep-into     | <b>90.0<math>\pm</math>8.5</b>  | 51.2 $\pm$ 18.9                 | 71.2 $\pm$ 14.9                 | 55.0 $\pm$ 21.6                 | 64.5 $\pm$ 8.3                  | 0.0 $\pm$ 0.0                   | 0.8 $\pm$ 1.0                   | 30.5 $\pm$ 22.0                 | 46.5 $\pm$ 21.8                 |
| 15. Lever-pull     | 1.2 $\pm$ 2.3                   | 3.2 $\pm$ 2.7                   | 0.0 $\pm$ 0.0                   | <b>12.5<math>\pm</math>10.2</b> | 0.5 $\pm$ 0.8                   | 0.5 $\pm$ 0.9                   | 0.5 $\pm$ 0.9                   | 0.2 $\pm$ 0.5                   | 0.5 $\pm$ 0.9                   |
| Test mean          | 32.8 $\pm$ 3.9                  | <b>33.4<math>\pm</math>5.0</b>  | 30.8 $\pm$ 7.7                  | 26.2 $\pm$ 8.7                  | 15.1 $\pm$ 2.7                  | 3.9 $\pm$ 3.7                   | 0.8 $\pm$ 0.5                   | 14.1 $\pm$ 6.1                  | 19.8 $\pm$ 6.0                  |

Table 7: **Meta-World V2 ML-10 return.** We report the final return of baselines and our methods at the last rollout episode on the Meta-World ML-10 analogous to the success rate in Table 6. Results are reported as the mean  $\pm$  95% confidence intervals of 8 seeds at 250M steps.

| Index. Task        | SDVT                           | SDVT-LW                        | SD                             | SD-LW                        | RL <sup>2</sup>              | MAML                           | PEARL          | VariBAD         | LDM             |
|--------------------|--------------------------------|--------------------------------|--------------------------------|------------------------------|------------------------------|--------------------------------|----------------|-----------------|-----------------|
| 1. Reach           | 3565 $\pm$ 132                 | 3681 $\pm$ 115                 | 3708 $\pm$ 228                 | 3806 $\pm$ 220               | 2291 $\pm$ 276               | <b>3899<math>\pm</math>560</b> | 3841 $\pm$ 554 | 3829 $\pm$ 153  | 3740 $\pm$ 59   |
| 2. Push            | <b>3923<math>\pm</math>339</b> | 3493 $\pm$ 469                 | 3636 $\pm$ 628                 | 3579 $\pm$ 870               | 815 $\pm$ 133                | 17 $\pm$ 1                     | 15 $\pm$ 2     | 2609 $\pm$ 990  | 2470 $\pm$ 1220 |
| 3. Pick-place      | <b>2257<math>\pm</math>239</b> | 2241 $\pm$ 300                 | 2131 $\pm$ 441                 | 2156 $\pm$ 593               | 501 $\pm$ 137                | 6 $\pm$ 0                      | 5 $\pm$ 1      | 1395 $\pm$ 759  | 1561 $\pm$ 861  |
| 4. Door-open       | 4441 $\pm$ 37                  | 3171 $\pm$ 825                 | <b>4447<math>\pm</math>106</b> | 3530 $\pm$ 831               | 1249 $\pm$ 115               | 3561 $\pm$ 753                 | 1064 $\pm$ 254 | 4051 $\pm$ 780  | 3249 $\pm$ 1134 |
| 5. Drawer-close    | 4813 $\pm$ 71                  | 4850 $\pm$ 10                  | 4850 $\pm$ 13                  | <b>4854<math>\pm</math>9</b> | 2193 $\pm$ 336               | 4804 $\pm$ 55                  | 4081 $\pm$ 314 | 4841 $\pm$ 18   | 4837 $\pm$ 18   |
| 6. Button-press    | 3392 $\pm$ 59                  | <b>3437<math>\pm</math>133</b> | 3257 $\pm$ 265                 | 3423 $\pm$ 209               | 1189 $\pm$ 151               | 2574 $\pm$ 274                 | 956 $\pm$ 300  | 3246 $\pm$ 161  | 3252 $\pm$ 140  |
| 7. Peg-insert-side | 1903 $\pm$ 430                 | 1919 $\pm$ 348                 | <b>2634<math>\pm</math>588</b> | 2225 $\pm$ 592               | 682 $\pm$ 157                | 7 $\pm$ 0                      | 7 $\pm$ 1      | 1148 $\pm$ 761  | 1237 $\pm$ 825  |
| 8. Window-open     | <b>4486<math>\pm</math>39</b>  | 4371 $\pm$ 77                  | 4349 $\pm$ 165                 | 4398 $\pm$ 79                | 1230 $\pm$ 112               | 3271 $\pm$ 732                 | 784 $\pm$ 390  | 4483 $\pm$ 32   | 4458 $\pm$ 42   |
| 9. Sweep           | <b>4235<math>\pm</math>202</b> | 3617 $\pm$ 682                 | 3823 $\pm$ 702                 | 3557 $\pm$ 634               | 906 $\pm$ 223                | 79 $\pm$ 38                    | 51 $\pm$ 14    | 2807 $\pm$ 1260 | 2789 $\pm$ 1333 |
| 10. Basketball     | 3549 $\pm$ 292                 | <b>3759<math>\pm</math>307</b> | 3466 $\pm$ 511                 | 3726 $\pm$ 331               | 532 $\pm$ 116                | 7 $\pm$ 1                      | 6 $\pm$ 2      | 2141 $\pm$ 1119 | 2035 $\pm$ 1256 |
| Train mean         | <b>3656<math>\pm</math>62</b>  | 3454 $\pm$ 137                 | 3630 $\pm$ 241                 | 3525 $\pm$ 297               | 1159 $\pm$ 83                | 1822 $\pm$ 136                 | 1081 $\pm$ 77  | 3055 $\pm$ 466  | 2963 $\pm$ 626  |
| 11. Drawer-open    | <b>2558<math>\pm</math>165</b> | 2280 $\pm$ 271                 | 2305 $\pm$ 298                 | 2310 $\pm$ 280               | 1649 $\pm$ 100               | 1737 $\pm$ 270                 | 1130 $\pm$ 87  | 2336 $\pm$ 340  | 2389 $\pm$ 386  |
| 12. Door-close     | 566 $\pm$ 335                  | <b>3030<math>\pm</math>857</b> | 1068 $\pm$ 740                 | 638 $\pm$ 670                | 568 $\pm$ 137                | 263 $\pm$ 278                  | 321 $\pm$ 221  | 1121 $\pm$ 689  | 1343 $\pm$ 1214 |
| 13. Shelf-place    | 501 $\pm$ 77                   | 550 $\pm$ 138                  | 494 $\pm$ 102                  | 434 $\pm$ 154                | <b>578<math>\pm</math>70</b> | 0 $\pm$ 0                      | 0 $\pm$ 0      | 211 $\pm$ 144   | 328 $\pm$ 204   |
| 14. Sweep-into     | <b>2221<math>\pm</math>764</b> | 1455 $\pm$ 615                 | 1359 $\pm$ 632                 | 1532 $\pm$ 721               | 490 $\pm$ 46                 | 41 $\pm$ 3                     | 48 $\pm$ 33    | 658 $\pm$ 358   | 1509 $\pm$ 889  |
| 15. Lever-pull     | 279 $\pm$ 38                   | 318 $\pm$ 45                   | <b>335<math>\pm</math>45</b>   | 300 $\pm$ 48                 | 291 $\pm$ 66                 | 156 $\pm$ 49                   | 200 $\pm$ 58   | 271 $\pm$ 26    | 260 $\pm$ 48    |
| Test mean          | 1225 $\pm$ 160                 | <b>1527<math>\pm</math>214</b> | 1112 $\pm$ 190                 | 1043 $\pm$ 234               | 715 $\pm$ 33                 | 439 $\pm$ 78                   | 340 $\pm$ 54   | 919 $\pm$ 143   | 1166 $\pm$ 264  |

Table 8: **Meta-World V2 ML-45 success rate.** We report the final success rates (%) of baselines and our methods for training tasks and test tasks of the Meta-World ML-45 benchmark. All results are reported as the mean success rate  $\pm$  95% confidence interval of 8 seeds at 400M steps.

| Index. Task                      | SDVT                            | SDVT-LW                         | SD                              | SD-LW                           | RL <sup>2</sup>                 | MAML                            | PEARL           | VariBAD                         | LDM                             |
|----------------------------------|---------------------------------|---------------------------------|---------------------------------|---------------------------------|---------------------------------|---------------------------------|-----------------|---------------------------------|---------------------------------|
| 1. Assembly                      | 0.0 $\pm$ 0.0                   | 0.0 $\pm$ 0.0                   | 0.0 $\pm$ 0.0                   | 0.0 $\pm$ 0.0                   | <b>2.2<math>\pm</math>0.4</b>   | 0.0 $\pm$ 0.0                   | 0.0 $\pm$ 0.1   | 0.0 $\pm$ 0.0                   | 0.0 $\pm$ 0.0                   |
| 2. Basketball                    | <b>24.8<math>\pm</math>17.7</b> | 3.0 $\pm$ 3.6                   | 23.8 $\pm$ 19.2                 | 24.2 $\pm$ 13.6                 | 21.0 $\pm$ 9.8                  | 0.0 $\pm$ 0.0                   | 0.0 $\pm$ 0.0   | 19.8 $\pm$ 13.7                 | 10.2 $\pm$ 8.9                  |
| 3. Button-press<br>-topdown      | 95.0 $\pm$ 7.6                  | 94.5 $\pm$ 0.6                  | <b>100.0<math>\pm</math>0.0</b> | 98.0 $\pm$ 1.7                  | 98.8 $\pm$ 1.0                  | 78.2 $\pm$ 21.2                 | 7.5 $\pm$ 8.6   | 99.5 $\pm$ 0.6                  | 82.5 $\pm$ 18.7                 |
| 4. Button-press<br>-topdown-wall | 94.0 $\pm$ 7.9                  | 96.5 $\pm$ 0.6                  | 99.0 $\pm$ 1.4                  | 99.5 $\pm$ 0.6                  | 98.5 $\pm$ 1.5                  | 78.2 $\pm$ 21.6                 | 9.5 $\pm$ 10.6  | <b>99.8<math>\pm</math>0.5</b>  | 86.2 $\pm$ 15.6                 |
| 5. Button-press                  | 93.2 $\pm$ 3.3                  | 96.5 $\pm$ 0.6                  | 89.0 $\pm$ 8.1                  | <b>99.0<math>\pm</math>0.7</b>  | 84.2 $\pm$ 3.2                  | 95.5 $\pm$ 1.9                  | 26.8 $\pm$ 11.3 | 98.0 $\pm$ 1.0                  | 93.5 $\pm$ 8.0                  |
| 6. Button-press<br>-wall         | <b>86.0<math>\pm</math>11.6</b> | 68.0 $\pm$ 4.0                  | 80.5 $\pm$ 8.7                  | 75.5 $\pm$ 9.4                  | 67.0 $\pm$ 4.8                  | 71.2 $\pm$ 10.6                 | 20.2 $\pm$ 8.3  | 74.5 $\pm$ 8.3                  | 56.0 $\pm$ 11.3                 |
| 7. Coffee-button                 | <b>100.0<math>\pm</math>0.0</b> | <b>100.0<math>\pm</math>0.0</b> | <b>100.0<math>\pm</math>0.0</b> | 97.5 $\pm$ 2.3                  | 97.5 $\pm$ 1.6                  | 92.0 $\pm$ 4.9                  | 2.8 $\pm$ 1.3   | 78.0 $\pm$ 14.7                 | <b>100.0<math>\pm</math>0.0</b> |
| 8. Coffee-pull                   | 37.2 $\pm$ 19.1                 | 33.2 $\pm$ 12.2                 | 45.5 $\pm$ 23.4                 | 46.5 $\pm$ 22.0                 | <b>65.0<math>\pm</math>4.3</b>  | 0.5 $\pm$ 0.3                   | 0.0 $\pm$ 0.1   | 52.5 $\pm$ 10.5                 | 48.8 $\pm$ 12.9                 |
| 9. Coffee-push                   | 64.8 $\pm$ 6.5                  | 37.0 $\pm$ 15.8                 | 56.8 $\pm$ 2.7                  | 67.8 $\pm$ 12.6                 | 60.8 $\pm$ 9.0                  | 22.0 $\pm$ 10.6                 | 3.0 $\pm$ 2.4   | 76.5 $\pm$ 10.8                 | <b>81.8<math>\pm</math>5.8</b>  |
| 10. Dial-turn                    | <b>87.2<math>\pm</math>4.4</b>  | 86.2 $\pm$ 2.9                  | 82.8 $\pm$ 7.9                  | 67.2 $\pm$ 11.9                 | 14.5 $\pm$ 8.3                  | 81.2 $\pm$ 8.8                  | 9.8 $\pm$ 7.7   | 44.0 $\pm$ 13.9                 | 60.8 $\pm$ 5.9                  |
| 11. Disassemble                  | 59.5 $\pm$ 32.0                 | 32.0 $\pm$ 14.7                 | <b>87.8<math>\pm</math>6.2</b>  | 74.0 $\pm$ 10.9                 | 23.2 $\pm$ 27.1                 | 0.0 $\pm$ 0.1                   | 0.2 $\pm$ 0.2   | 44.5 $\pm$ 21.8                 | 65.5 $\pm$ 18.5                 |
| 12. Door-close                   | <b>100.0<math>\pm</math>0.0</b> | <b>100.0<math>\pm</math>0.0</b> | 99.5 $\pm$ 0.6                  | 97.0 $\pm$ 3.6                  | 98.2 $\pm$ 1.2                  | <b>100.0<math>\pm</math>0.0</b> | 52.2 $\pm$ 21.2 | <b>100.0<math>\pm</math>0.0</b> | 99.2 $\pm$ 1.0                  |
| 13. Door-open                    | 56.2 $\pm$ 31.2                 | 56.0 $\pm$ 24.3                 | <b>99.8<math>\pm</math>0.5</b>  | 64.8 $\pm$ 26.9                 | 54.0 $\pm$ 23.8                 | 6.8 $\pm$ 11.9                  | 0.5 $\pm$ 0.3   | 98.0 $\pm$ 1.4                  | 96.2 $\pm$ 3.6                  |
| 14. Drawer-close                 | <b>100.0<math>\pm</math>0.0</b> | 99.0 $\pm$ 1.2                  | 97.2 $\pm$ 2.2                  | <b>100.0<math>\pm</math>0.0</b> | 98.5 $\pm$ 0.5                  | 100.0 $\pm$ 0.1                 | 96.5 $\pm$ 2.9  | 99.2 $\pm$ 0.7                  | 96.5 $\pm$ 4.0                  |
| 15. Drawer-open                  | 96.5 $\pm$ 1.1                  | 83.8 $\pm$ 16.3                 | 96.0 $\pm$ 4.8                  | 87.2 $\pm$ 13.8                 | 83.5 $\pm$ 8.4                  | 0.0 $\pm$ 0.0                   | 2.5 $\pm$ 1.3   | <b>100.0<math>\pm</math>0.0</b> | 93.2 $\pm$ 6.6                  |
| 16. Faucet-open                  | 99.5 $\pm$ 0.6                  | 82.5 $\pm$ 21.0                 | 99.2 $\pm$ 1.0                  | <b>100.0<math>\pm</math>0.0</b> | 86.8 $\pm$ 9.7                  | 70.5 $\pm$ 19.1                 | 28.8 $\pm$ 11.7 | 95.5 $\pm$ 1.7                  | 98.2 $\pm$ 1.5                  |
| 17. Faucet-close                 | 97.0 $\pm$ 5.5                  | 77.0 $\pm$ 18.3                 | 99.2 $\pm$ 0.7                  | 97.0 $\pm$ 2.3                  | 56.8 $\pm$ 16.8                 | 52.8 $\pm$ 22.5                 | 15.0 $\pm$ 6.3  | <b>99.5<math>\pm</math>0.6</b>  | 99.2 $\pm$ 1.0                  |
| 18. Hammer                       | 2.0 $\pm$ 3.7                   | 0.0 $\pm$ 0.0                   | 0.0 $\pm$ 0.0                   | 1.5 $\pm$ 1.8                   | <b>12.8<math>\pm</math>15.4</b> | 6.8 $\pm$ 5.8                   | 2.2 $\pm$ 1.3   | 0.0 $\pm$ 0.0                   | 0.0 $\pm$ 0.0                   |
| 19. Handle-press<br>-side        | 97.8 $\pm$ 4.1                  | <b>100.0<math>\pm</math>0.0</b> | <b>100.0<math>\pm</math>0.0</b> | <b>100.0<math>\pm</math>0.0</b> | 99.8 $\pm$ 0.1                  | 83.2 $\pm$ 12.2                 | 12.8 $\pm$ 11.8 | <b>100.0<math>\pm</math>0.0</b> | 99.8 $\pm$ 0.5                  |
| 20. Handle-press                 | 98.5 $\pm$ 1.1                  | 99.0 $\pm$ 1.2                  | <b>100.0<math>\pm</math>0.0</b> | <b>100.0<math>\pm</math>0.0</b> | 99.8 $\pm$ 0.1                  | 72.0 $\pm$ 20.2                 | 66.8 $\pm$ 19.8 | <b>100.0<math>\pm</math>0.0</b> | <b>100.0<math>\pm</math>0.0</b> |
| 21. Handle-pull<br>-side         | 40.0 $\pm$ 22.3                 | 5.2 $\pm$ 5.2                   | 50.5 $\pm$ 25.2                 | 39.5 $\pm$ 24.1                 | <b>83.2<math>\pm</math>4.3</b>  | 13.8 $\pm$ 15.5                 | 0.8 $\pm$ 0.7   | 41.2 $\pm$ 23.3                 | 31.8 $\pm$ 28.5                 |
| 22. Handle-pull                  | 0.0 $\pm$ 0.0                   | 1.0 $\pm$ 1.2                   | 35.2 $\pm$ 31.5                 | 3.8 $\pm$ 2.6                   | 0.2 $\pm$ 0.2                   | <b>49.0<math>\pm</math>18.9</b> | 0.8 $\pm$ 0.4   | 1.0 $\pm$ 0.7                   | 1.0 $\pm$ 1.0                   |
| 23. Lever-pull                   | 10.0 $\pm$ 9.8                  | 16.0 $\pm$ 4.4                  | 11.5 $\pm$ 6.8                  | <b>23.2<math>\pm</math>16.6</b> | 1.0 $\pm$ 0.8                   | 3.2 $\pm$ 3.9                   | 0.0 $\pm$ 0.0   | 20.0 $\pm$ 11.3                 | 6.0 $\pm$ 3.9                   |
| 24. Peg-insert<br>-side          | 1.0 $\pm$ 0.7                   | 0.0 $\pm$ 0.0                   | 0.8 $\pm$ 0.7                   | 0.5 $\pm$ 0.6                   | <b>19.5<math>\pm</math>5.8</b>  | 0.0 $\pm$ 0.0                   | 0.0 $\pm$ 0.0   | 0.0 $\pm$ 0.0                   | 2.2 $\pm$ 2.7                   |
| 25. Pick-place<br>-wall          | 30.0 $\pm$ 16.7                 | 29.5 $\pm$ 9.8                  | <b>48.5<math>\pm</math>3.7</b>  | 41.2 $\pm$ 11.7                 | 42.5 $\pm$ 4.0                  | 6.5 $\pm$ 6.0                   | 0.0 $\pm$ 0.0   | 35.5 $\pm$ 4.6                  | 31.2 $\pm$ 15.9                 |
| 26. Pick-out<br>-of-hole         | 26.8 $\pm$ 16.4                 | 23.2 $\pm$ 12.0                 | <b>53.0<math>\pm</math>7.0</b>  | 43.8 $\pm$ 8.4                  | 5.5 $\pm$ 2.7                   | 0.0 $\pm$ 0.0                   | 0.0 $\pm$ 0.0   | 32.0 $\pm$ 20.8                 | 34.0 $\pm$ 11.4                 |
| 27. Reach                        | 31.5 $\pm$ 6.7                  | 13.5 $\pm$ 4.0                  | 36.0 $\pm$ 8.7                  | 25.5 $\pm$ 6.7                  | <b>45.8<math>\pm</math>8.4</b>  | 18.8 $\pm$ 10.6                 | 13.5 $\pm$ 7.2  | 27.0 $\pm$ 4.7                  | 28.5 $\pm$ 3.2                  |
| 28. Push-back                    | 40.8 $\pm$ 21.3                 | 31.0 $\pm$ 11.9                 | 76.0 $\pm$ 5.3                  | 44.5 $\pm$ 9.3                  | <b>77.8<math>\pm</math>4.6</b>  | 0.0 $\pm$ 0.0                   | 0.0 $\pm$ 0.0   | 41.5 $\pm$ 24.1                 | 49.5 $\pm$ 10.5                 |
| 29. Push                         | 50.5 $\pm$ 5.7                  | <b>62.8<math>\pm</math>5.1</b>  | 36.2 $\pm$ 14.3                 | 29.2 $\pm$ 18.3                 | 58.5 $\pm$ 1.6                  | 16.8 $\pm$ 14.9                 | 1.8 $\pm$ 1.4   | 45.0 $\pm$ 9.5                  | 35.2 $\pm$ 11.7                 |
| 30. Pick-place                   | 28.2 $\pm$ 13.5                 | 26.2 $\pm$ 6.5                  | <b>57.5<math>\pm</math>9.1</b>  | 36.8 $\pm$ 3.9                  | 43.5 $\pm$ 1.8                  | 4.8 $\pm$ 5.3                   | 0.0 $\pm$ 0.0   | 34.8 $\pm$ 3.9                  | 44.0 $\pm$ 5.2                  |
| 31. Plate-slide                  | <b>75.8<math>\pm</math>5.7</b>  | 56.5 $\pm$ 6.9                  | 58.2 $\pm$ 10.8                 | 60.2 $\pm$ 10.4                 | 20.5 $\pm$ 14.4                 | 17.0 $\pm$ 15.2                 | 9.5 $\pm$ 10.6  | 55.2 $\pm$ 6.8                  | 57.0 $\pm$ 7.3                  |
| 32. Plate-slide<br>-side         | 81.8 $\pm$ 0.8                  | 1.0 $\pm$ 0.7                   | <b>97.0<math>\pm</math>3.6</b>  | 87.0 $\pm$ 3.2                  | 70.8 $\pm$ 5.1                  | 2.0 $\pm$ 3.6                   | 0.2 $\pm$ 0.3   | 89.5 $\pm$ 13.6                 | 59.5 $\pm$ 24.2                 |
| 33. Plate-slide<br>-back         | 82.0 $\pm$ 6.2                  | 86.0 $\pm$ 9.7                  | 83.5 $\pm$ 4.2                  | 76.5 $\pm$ 10.8                 | <b>90.0<math>\pm</math>3.9</b>  | 0.0 $\pm$ 0.0                   | 0.8 $\pm$ 0.8   | 84.0 $\pm$ 6.1                  | 80.2 $\pm$ 7.9                  |
| 34. Plate-slide<br>-back-side    | 71.8 $\pm$ 5.6                  | 59.0 $\pm$ 4.5                  | 60.8 $\pm$ 11.2                 | 73.5 $\pm$ 10.8                 | <b>81.5<math>\pm</math>1.9</b>  | 5.5 $\pm$ 5.7                   | 0.5 $\pm$ 0.6   | 73.5 $\pm$ 2.4                  | 80.8 $\pm$ 8.0                  |
| 35. Peg-unplug<br>-side          | 40.0 $\pm$ 17.2                 | 50.8 $\pm$ 12.0                 | 54.0 $\pm$ 5.1                  | 47.8 $\pm$ 17.8                 | 54.0 $\pm$ 3.7                  | 13.0 $\pm$ 3.4                  | 3.5 $\pm$ 2.1   | <b>60.5<math>\pm</math>5.8</b>  | 48.8 $\pm$ 9.1                  |
| 36. Soccer                       | 29.8 $\pm$ 7.2                  | 25.5 $\pm$ 8.8                  | 16.0 $\pm$ 2.7                  | 24.5 $\pm$ 16.9                 | <b>37.8<math>\pm</math>4.7</b>  | 14.5 $\pm$ 12.7                 | 2.5 $\pm$ 1.8   | 20.2 $\pm$ 5.4                  | 15.2 $\pm$ 2.5                  |
| 37. Stick-push                   | 0.0 $\pm$ 0.0                   | 47.5 $\pm$ 32.9                 | 0.0 $\pm$ 0.0                   | 20.5 $\pm$ 24.6                 | <b>88.2<math>\pm</math>3.4</b>  | 0.0 $\pm$ 0.1                   | 0.0 $\pm$ 0.0   | 0.0 $\pm$ 0.0                   | 0.0 $\pm$ 0.0                   |
| 38. Stick-pull                   | 0.0 $\pm$ 0.0                   | <b>15.0<math>\pm</math>10.4</b> | 0.0 $\pm$ 0.0                   | 12.0 $\pm$ 14.4                 | 4.5 $\pm$ 3.6                   | 0.0 $\pm$ 0.0                   | 0.0 $\pm$ 0.0   | 0.0 $\pm$ 0.0                   | 0.0 $\pm$ 0.0                   |
| 39. Push-wall                    | 51.0 $\pm$ 4.9                  | 50.0 $\pm$ 25.4                 | 62.8 $\pm$ 21.7                 | 27.5 $\pm$ 20.8                 | <b>72.5<math>\pm</math>5.4</b>  | 18.2 $\pm$ 16.5                 | 0.2 $\pm$ 0.2   | 63.8 $\pm$ 15.7                 | 44.0 $\pm$ 20.5                 |
| 40. Reach-wall                   | 16.2 $\pm$ 5.9                  | 7.0 $\pm$ 4.9                   | 27.0 $\pm$ 8.1                  | 28.0 $\pm$ 7.3                  | <b>65.0<math>\pm</math>5.6</b>  | 35.2 $\pm$ 20.2                 | 15.0 $\pm$ 6.9  | 18.0 $\pm$ 3.6                  | 13.8 $\pm$ 9.1                  |
| 41. Shelf-place                  | 0.0 $\pm$ 0.0                   | 0.5 $\pm$ 0.6                   | 0.8 $\pm$ 0.7                   | 0.0 $\pm$ 0.0                   | 3.8 $\pm$ 2.9                   | 0.0 $\pm$ 0.0                   | 0.0 $\pm$ 0.0   | <b>4.5<math>\pm</math>4.6</b>   | 0.8 $\pm$ 1.0                   |
| 42. Sweep-into                   | 92.8 $\pm$ 3.2                  | 91.0 $\pm$ 2.9                  | 90.5 $\pm$ 5.8                  | 90.2 $\pm$ 8.6                  | 87.5 $\pm$ 1.5                  | 23.8 $\pm$ 21.3                 | 4.8 $\pm$ 3.2   | 97.8 $\pm$ 2.6                  | <b>98.5<math>\pm</math>1.3</b>  |
| 43. Sweep                        | 11.8 $\pm$ 10.1                 | 27.0 $\pm$ 17.4                 | 33.0 $\pm$ 17.7                 | 20.0 $\pm$ 23.2                 | <b>41.5<math>\pm</math>21.1</b> | 0.0 $\pm$ 0.0                   | 0.0 $\pm$ 0.0   | 40.5 $\pm$ 28.1                 | 5.5 $\pm$ 6.5                   |
| 44. Window-open                  | 99.5 $\pm$ 0.6                  | <b>100.0<math>\pm</math>0.0</b> | <b>100.0<math>\pm</math>0.0</b> | <b>100.0<math>\pm</math>0.0</b> | 97.8 $\pm$ 1.0                  | 91.5 $\pm$ 6.6                  | 27.5 $\pm$ 11.4 | 98.2 $\pm$ 1.6                  | 98.8 $\pm$ 2.3                  |
| 45. Window-close                 | <b>100.0<math>\pm</math>0.0</b> | 99.0 $\pm$ 1.2                  | <b>100.0<math>\pm</math>0.0</b> | <b>100.0<math>\pm</math>0.0</b> | 95.2 $\pm$ 3.3                  | 97.0 $\pm$ 1.9                  | 27.2 $\pm$ 11.0 | <b>100.0<math>\pm</math>0.0</b> | 99.8 $\pm$ 0.5                  |
| Train mean                       | 55.6 $\pm$ 4.2                  | 50.4 $\pm$ 4.1                  | <b>61.0<math>\pm</math>1.7</b>  | 56.7 $\pm$ 1.5                  | 58.0 $\pm$ 0.4                  | 32.0 $\pm$ 1.4                  | 10.3 $\pm$ 2.4  | 57.0 $\pm$ 1.2                  | 54.1 $\pm$ 0.9                  |
| 46. Bin-picking                  | 0.0 $\pm$ 0.0                   | 1.5 $\pm$ 1.8                   | <b>2.2<math>\pm</math>1.1</b>   | 1.2 $\pm$ 1.0                   | 1.2 $\pm$ 0.9                   | 0.0 $\pm$ 0.0                   | 0.0 $\pm$ 0.0   | 1.8 $\pm$ 1.1                   | 0.5 $\pm$ 0.9                   |
| 47. Box-close                    | 0.5 $\pm$ 0.6                   | 0.0 $\pm$ 0.0                   | 0.5 $\pm$ 0.6                   | 0.0 $\pm$ 0.0                   | 0.5 $\pm$ 0.3                   | 0.0 $\pm$ 0.0                   | 0.0 $\pm$ 0.0   | <b>5.5<math>\pm</math>4.6</b>   | 0.0 $\pm$ 0.0                   |
| 48. Hand-insert                  | 2.2 $\pm$ 2.3                   | 3.8 $\pm$ 3.1                   | 1.0 $\pm$ 1.2                   | 1.5 $\pm$ 1.8                   | 5.2 $\pm$ 3.0                   | <b>23.0<math>\pm</math>15.8</b> | 0.0 $\pm$ 0.0   | 1.5 $\pm$ 1.1                   | 0.8 $\pm$ 1.0                   |
| 49. Door-lock                    | 59.2 $\pm$ 9.1                  | <b>74.8<math>\pm</math>7.5</b>  | 49.8 $\pm$ 15.5                 | 51.5 $\pm$ 9.5                  | 14.0 $\pm$ 8.2                  | 11.2 $\pm$ 10.5                 | 8.2 $\pm$ 10.0  | 37.5 $\pm$ 20.3                 | 59.2 $\pm$ 9.6                  |
| 50. Door-unlock                  | <b>78.5<math>\pm</math>9.9</b>  | 75.8 $\pm$ 9.1                  | 61.8 $\pm$ 10.2                 | 72.5 $\pm$ 9.5                  | 38.0 $\pm$ 11.3                 | 64.5 $\pm$ 19.2                 | 25.0 $\pm$ 19.2 | 64.2 $\pm$ 4.3                  | 63.2 $\pm$ 6.9                  |
| Test mean                        | 28.1 $\pm$ 3.2                  | <b>31.2<math>\pm</math>1.2</b>  | 23.0 $\pm$ 5.1                  | 25.4 $\pm$ 2.9                  | 11.8 $\pm$ 3.2                  | 19.8 $\pm$ 6.3                  | 6.7 $\pm$ 3.3   | 22.1 $\pm$ 3.5                  | 24.8 $\pm$ 2.9                  |

Table 9: **Meta-World V2 ML-45 return.** We report the final return of baselines and our methods at the last rollout episode on the Meta-World ML-45 analogous to the success rate in Table 8. Results are reported as the mean  $\pm$  95% confidence intervals of 8 seeds at 400M steps.

| Index. Task                      | SDVT                           | SDVT-LW                        | SD                             | SD-LW                          | RL <sup>2</sup>               | MAML                            | PEARL           | VariBAD                        | LDM                            |
|----------------------------------|--------------------------------|--------------------------------|--------------------------------|--------------------------------|-------------------------------|---------------------------------|-----------------|--------------------------------|--------------------------------|
| 1. Assembly                      | 1813 $\pm$ 485                 | <b>2573<math>\pm</math>117</b> | 2414 $\pm$ 233                 | 2285 $\pm$ 195                 | 1202 $\pm$ 19                 | 268 $\pm$ 70                    | 208 $\pm$ 9     | 2434 $\pm$ 161                 | 2572 $\pm$ 56                  |
| 2. Basketball                    | 1929 $\pm$ 688                 | 1443 $\pm$ 524                 | 2215 $\pm$ 148                 | <b>2581<math>\pm</math>129</b> | 489 $\pm$ 38                  | 100 $\pm$ 90                    | 6 $\pm$ 2       | 1311 $\pm$ 651                 | 2227 $\pm$ 236                 |
| 3. Button-press<br>-topdown      | 3120 $\pm$ 447                 | 3297 $\pm$ 328                 | <b>3580<math>\pm</math>87</b>  | 3343 $\pm$ 176                 | 1344 $\pm$ 14                 | 2660 $\pm$ 633                  | 543 $\pm$ 273   | 3348 $\pm$ 227                 | 3208 $\pm$ 354                 |
| 4. Button-press<br>-topdown-wall | 3217 $\pm$ 384                 | 3386 $\pm$ 246                 | <b>3614<math>\pm</math>110</b> | 3392 $\pm$ 185                 | 1359 $\pm$ 18                 | 2664 $\pm$ 638                  | 604 $\pm$ 314   | 3337 $\pm$ 279                 | 3218 $\pm$ 319                 |
| 5. Button-press                  | <b>3100<math>\pm</math>270</b> | 2977 $\pm$ 199                 | 2833 $\pm$ 208                 | 2938 $\pm$ 193                 | 1165 $\pm$ 29                 | 2942 $\pm$ 178                  | 434 $\pm$ 195   | 2878 $\pm$ 74                  | 2745 $\pm$ 205                 |
| 6. Button-press<br>-wall         | <b>3401<math>\pm</math>220</b> | 2916 $\pm$ 94                  | 3148 $\pm$ 157                 | 3165 $\pm$ 92                  | 1378 $\pm$ 17                 | 2589 $\pm$ 341                  | 327 $\pm$ 183   | 3040 $\pm$ 136                 | 2991 $\pm$ 108                 |
| 7. Coffee-button                 | 1605 $\pm$ 678                 | 2196 $\pm$ 430                 | 2517 $\pm$ 296                 | 2420 $\pm$ 303                 | 1348 $\pm$ 40                 | <b>3342<math>\pm</math>157</b>  | 80 $\pm$ 20     | 2253 $\pm$ 303                 | 2610 $\pm$ 271                 |
| 8. Coffee-pull                   | 1032 $\pm$ 307                 | 916 $\pm$ 323                  | 1010 $\pm$ 338                 | <b>1305<math>\pm</math>395</b> | 572 $\pm$ 35                  | 38 $\pm$ 7                      | 21 $\pm$ 5      | 1292 $\pm$ 260                 | 1244 $\pm$ 220                 |
| 9. Coffee-push                   | 1424 $\pm$ 443                 | 889 $\pm$ 455                  | 1254 $\pm$ 137                 | 1687 $\pm$ 497                 | 504 $\pm$ 41                  | 111 $\pm$ 47                    | 20 $\pm$ 10     | 1901 $\pm$ 413                 | <b>2175<math>\pm</math>491</b> |
| 10. Dial-turn                    | 1821 $\pm$ 478                 | 1704 $\pm$ 520                 | <b>1835<math>\pm</math>414</b> | 1825 $\pm$ 484                 | 944 $\pm$ 70                  | 1553 $\pm$ 254                  | 449 $\pm$ 407   | 680 $\pm$ 130                  | 1101 $\pm$ 571                 |
| 11. Disassemble                  | 2451 $\pm$ 1226                | 897 $\pm$ 350                  | <b>3387<math>\pm</math>382</b> | 2840 $\pm$ 485                 | 2642 $\pm$ 1397               | 130 $\pm$ 58                    | 150 $\pm$ 25    | 1564 $\pm$ 749                 | 2268 $\pm$ 688                 |
| 12. Door-close                   | 4178 $\pm$ 204                 | <b>4404<math>\pm</math>22</b>  | 4375 $\pm$ 17                  | 4251 $\pm$ 93                  | 1231 $\pm$ 20                 | 4265 $\pm$ 158                  | 2430 $\pm$ 965  | 4181 $\pm$ 105                 | 4067 $\pm$ 174                 |
| 13. Door-open                    | 3086 $\pm$ 761                 | 2215 $\pm$ 430                 | <b>4134<math>\pm</math>151</b> | 2833 $\pm$ 517                 | 1312 $\pm$ 216                | 1095 $\pm$ 316                  | 469 $\pm$ 142   | 3741 $\pm$ 333                 | 3857 $\pm$ 325                 |
| 14. Drawer-close                 | 4310 $\pm$ 274                 | 4544 $\pm$ 54                  | 4392 $\pm$ 307                 | 4680 $\pm$ 80                  | 1626 $\pm$ 25                 | <b>4725<math>\pm</math>28</b>   | 4539 $\pm$ 225  | 4515 $\pm$ 112                 | 4506 $\pm$ 206                 |
| 15. Drawer-open                  | 3964 $\pm$ 96                  | 3624 $\pm$ 334                 | <b>4265<math>\pm</math>106</b> | 4035 $\pm$ 221                 | 2169 $\pm$ 118                | 2259 $\pm$ 235                  | 1288 $\pm$ 367  | 4180 $\pm$ 114                 | 3876 $\pm$ 270                 |
| 16. Faucet-open                  | 4572 $\pm$ 68                  | 4057 $\pm$ 692                 | 4582 $\pm$ 81                  | <b>4674<math>\pm</math>21</b>  | 1925 $\pm$ 193                | 3757 $\pm$ 540                  | 1810 $\pm$ 497  | 4338 $\pm$ 155                 | 4479 $\pm$ 118                 |
| 17. Faucet-close                 | 4166 $\pm$ 351                 | 3656 $\pm$ 471                 | <b>4457<math>\pm</math>194</b> | 4300 $\pm$ 95                  | 1662 $\pm$ 115                | 3298 $\pm$ 561                  | 1470 $\pm$ 414  | 4267 $\pm$ 57                  | 4401 $\pm$ 196                 |
| 18. Hammer                       | 466 $\pm$ 60                   | 465 $\pm$ 17                   | 469 $\pm$ 5                    | 459 $\pm$ 16                   | <b>738<math>\pm</math>233</b> | 649 $\pm$ 135                   | 420 $\pm$ 20    | 476 $\pm$ 4                    | 384 $\pm$ 115                  |
| 19. Handle-press<br>-side        | 4676 $\pm$ 192                 | 4722 $\pm$ 14                  | 4767 $\pm$ 38                  | <b>4797<math>\pm</math>17</b>  | 2276 $\pm$ 43                 | 3696 $\pm$ 522                  | 652 $\pm$ 524   | 4772 $\pm$ 19                  | 4737 $\pm$ 51                  |
| 20. Handle-press                 | 4601 $\pm$ 74                  | 4355 $\pm$ 183                 | 4480 $\pm$ 147                 | <b>4789<math>\pm</math>14</b>  | 2239 $\pm$ 86                 | 2902 $\pm$ 791                  | 3036 $\pm$ 958  | 4728 $\pm$ 22                  | 4747 $\pm$ 55                  |
| 21. Handle-pull<br>-side         | 853 $\pm$ 523                  | 83 $\pm$ 30                    | <b>1507<math>\pm</math>832</b> | 907 $\pm$ 731                  | 565 $\pm$ 43                  | 199 $\pm$ 300                   | 12 $\pm$ 5      | 991 $\pm$ 576                  | 917 $\pm$ 826                  |
| 22. Handle-pull                  | 1469 $\pm$ 153                 | 1491 $\pm$ 110                 | <b>2260<math>\pm</math>666</b> | 1541 $\pm$ 100                 | 2048 $\pm$ 86                 | 2001 $\pm$ 597                  | 29 $\pm$ 19     | 1549 $\pm$ 57                  | 1612 $\pm$ 170                 |
| 23. Lever-pull                   | 446 $\pm$ 84                   | 496 $\pm$ 74                   | 483 $\pm$ 39                   | <b>500<math>\pm</math>106</b>  | 305 $\pm$ 21                  | 264 $\pm$ 60                    | 119 $\pm$ 38    | 457 $\pm$ 32                   | 345 $\pm$ 27                   |
| 24. Peg-insert<br>-side          | 767 $\pm$ 408                  | 757 $\pm$ 48                   | <b>1106<math>\pm</math>186</b> | 1067 $\pm$ 192                 | 640 $\pm$ 77                  | 33 $\pm$ 24                     | 7 $\pm$ 2       | 778 $\pm$ 101                  | 962 $\pm$ 232                  |
| 25. Pick-place<br>-wall          | 1647 $\pm$ 893                 | 2011 $\pm$ 717                 | <b>2765<math>\pm</math>64</b>  | 2570 $\pm$ 543                 | 491 $\pm$ 22                  | 389 $\pm$ 359                   | 0 $\pm$ 0       | 2042 $\pm$ 501                 | 1873 $\pm$ 854                 |
| 26. Pick-out<br>-of-hole         | 809 $\pm$ 435                  | 1015 $\pm$ 365                 | 1319 $\pm$ 183                 | <b>1385<math>\pm</math>310</b> | 270 $\pm$ 26                  | 20 $\pm$ 1                      | 8 $\pm$ 1       | 1129 $\pm$ 261                 | 1247 $\pm$ 392                 |
| 27. Reach                        | 2682 $\pm$ 225                 | 2448 $\pm$ 313                 | 3048 $\pm$ 238                 | <b>3116<math>\pm</math>182</b> | 2273 $\pm$ 49                 | 2447 $\pm$ 829                  | 2466 $\pm$ 1079 | 2843 $\pm$ 147                 | 3085 $\pm$ 183                 |
| 28. Push-back                    | 674 $\pm$ 362                  | 514 $\pm$ 154                  | <b>1438<math>\pm</math>156</b> | 1218 $\pm$ 334                 | 433 $\pm$ 42                  | 11 $\pm$ 7                      | 8 $\pm$ 3       | 871 $\pm$ 372                  | 1404 $\pm$ 324                 |
| 29. Push                         | 3130 $\pm$ 290                 | 3139 $\pm$ 655                 | 2961 $\pm$ 253                 | 2581 $\pm$ 530                 | 945 $\pm$ 32                  | 634 $\pm$ 555                   | 34 $\pm$ 13     | 3427 $\pm$ 185                 | <b>3524<math>\pm</math>200</b> |
| 30. Pick-place                   | 1221 $\pm$ 650                 | 1582 $\pm$ 433                 | <b>2145<math>\pm</math>159</b> | 1992 $\pm$ 122                 | 576 $\pm$ 23                  | 247 $\pm$ 222                   | 5 $\pm$ 1       | 2034 $\pm$ 48                  | 2128 $\pm$ 144                 |
| 31. Plate-slide                  | <b>3526<math>\pm</math>161</b> | 2950 $\pm$ 232                 | 3022 $\pm$ 196                 | 2828 $\pm$ 303                 | 2863 $\pm$ 1349               | 1043 $\pm$ 789                  | 561 $\pm$ 490   | 2858 $\pm$ 251                 | 2801 $\pm$ 231                 |
| 32. Plate-slide<br>-side         | 3058 $\pm$ 289                 | 1362 $\pm$ 37                  | <b>3471<math>\pm</math>258</b> | 2761 $\pm$ 317                 | 949 $\pm$ 20                  | 322 $\pm$ 249                   | 56 $\pm$ 35     | 3107 $\pm$ 167                 | 2351 $\pm$ 462                 |
| 33. Plate-slide<br>-back         | 3783 $\pm$ 204                 | 3790 $\pm$ 239                 | 3844 $\pm$ 128                 | 3754 $\pm$ 272                 | 1544 $\pm$ 10                 | 581 $\pm$ 364                   | 655 $\pm$ 259   | <b>3900<math>\pm</math>155</b> | 3720 $\pm$ 325                 |
| 34. Plate-slide<br>-back-side    | 3732 $\pm$ 91                  | 3764 $\pm$ 149                 | 3755 $\pm$ 256                 | 3987 $\pm$ 228                 | 1561 $\pm$ 7                  | 676 $\pm$ 420                   | 133 $\pm$ 56    | <b>4099<math>\pm</math>72</b>  | 4094 $\pm$ 130                 |
| 35. Peg-unplug<br>-side          | 982 $\pm$ 390                  | 971 $\pm$ 331                  | 1187 $\pm$ 111                 | 1079 $\pm$ 464                 | 401 $\pm$ 36                  | 62 $\pm$ 26                     | 45 $\pm$ 28     | <b>1523<math>\pm</math>142</b> | 1087 $\pm$ 282                 |
| 36. Soccer                       | 1374 $\pm$ 169                 | <b>1566<math>\pm</math>207</b> | 1311 $\pm$ 129                 | 1348 $\pm$ 332                 | 671 $\pm$ 31                  | 439 $\pm$ 359                   | 98 $\pm$ 60     | 1399 $\pm$ 90                  | 1486 $\pm$ 82                  |
| 37. Stick-push                   | 47 $\pm$ 70                    | 786 $\pm$ 533                  | 11 $\pm$ 2                     | 291 $\pm$ 333                  | <b>955<math>\pm</math>14</b>  | 128 $\pm$ 212                   | 6 $\pm$ 1       | 17 $\pm$ 2                     | 10 $\pm$ 4                     |
| 38. Stick-pull                   | 25 $\pm$ 23                    | <b>905<math>\pm</math>616</b>  | 14 $\pm$ 3                     | 600 $\pm$ 702                  | 730 $\pm$ 46                  | 39 $\pm$ 52                     | 7 $\pm$ 1       | 19 $\pm$ 3                     | 11 $\pm$ 4                     |
| 39. Push-wall                    | 2547 $\pm$ 426                 | 2197 $\pm$ 668                 | <b>3291<math>\pm</math>421</b> | 2496 $\pm$ 639                 | 877 $\pm$ 85                  | 597 $\pm$ 532                   | 20 $\pm$ 7      | 2813 $\pm$ 716                 | 2744 $\pm$ 549                 |
| 40. Reach-wall                   | 1871 $\pm$ 157                 | 1889 $\pm$ 412                 | 2447 $\pm$ 462                 | 2741 $\pm$ 456                 | 2303 $\pm$ 89                 | <b>2802<math>\pm</math>1052</b> | 1741 $\pm$ 641  | 2102 $\pm$ 128                 | 1836 $\pm$ 569                 |
| 41. Shelf-place                  | 608 $\pm$ 308                  | 657 $\pm$ 195                  | 920 $\pm$ 55                   | <b>1056<math>\pm</math>165</b> | 623 $\pm$ 61                  | 9 $\pm$ 8                       | 0 $\pm$ 0       | 795 $\pm$ 186                  | 725 $\pm$ 167                  |
| 42. Sweep-into                   | 3755 $\pm$ 333                 | 3847 $\pm$ 400                 | 3869 $\pm$ 214                 | 3584 $\pm$ 495                 | 793 $\pm$ 67                  | 623 $\pm$ 541                   | 148 $\pm$ 82    | 3750 $\pm$ 159                 | <b>4151<math>\pm</math>185</b> |
| 43. Sweep                        | 1148 $\pm$ 98                  | 1433 $\pm$ 477                 | <b>1905<math>\pm</math>449</b> | 1415 $\pm$ 623                 | 872 $\pm$ 230                 | 160 $\pm$ 82                    | 36 $\pm$ 9      | 1865 $\pm$ 799                 | 1219 $\pm$ 325                 |
| 44. Window-open                  | 3789 $\pm$ 249                 | 4004 $\pm$ 190                 | 4138 $\pm$ 56                  | 4121 $\pm$ 53                  | 1163 $\pm$ 37                 | 2463 $\pm$ 1004                 | 705 $\pm$ 184   | <b>4177<math>\pm</math>123</b> | 3986 $\pm$ 154                 |
| 45. Window-close                 | 4201 $\pm$ 166                 | 4333 $\pm$ 135                 | 4293 $\pm$ 209                 | <b>4496<math>\pm</math>29</b>  | 1152 $\pm$ 109                | 3215 $\pm$ 425                  | 990 $\pm$ 417   | 4346 $\pm$ 111                 | 4450 $\pm$ 33                  |
| Train mean                       | 2379 $\pm$ 214                 | 2294 $\pm$ 202                 | <b>2672<math>\pm</math>79</b>  | 2578 $\pm$ 64                  | 1411 $\pm$ 22                 | 1388 $\pm$ 104                  | 597 $\pm$ 121   | 2492 $\pm$ 47                  | 2515 $\pm$ 67                  |
| 46. Bin-picking                  | 114 $\pm$ 44                   | 113 $\pm$ 56                   | <b>322<math>\pm</math>70</b>   | 140 $\pm$ 72                   | 265 $\pm$ 73                  | 37 $\pm$ 6                      | 12 $\pm$ 5      | 127 $\pm$ 27                   | 90 $\pm$ 29                    |
| 47. Box-close                    | 190 $\pm$ 49                   | 128 $\pm$ 2                    | 143 $\pm$ 5                    | 137 $\pm$ 9                    | <b>820<math>\pm</math>159</b> | 215 $\pm$ 26                    | 176 $\pm$ 40    | 243 $\pm$ 83                   | 151 $\pm$ 10                   |
| 48. Hand-insert                  | 299 $\pm$ 64                   | 465 $\pm$ 101                  | 386 $\pm$ 25                   | 392 $\pm$ 64                   | <b>467<math>\pm</math>48</b>  | 337 $\pm$ 188                   | 6 $\pm$ 2       | 377 $\pm$ 61                   | 398 $\pm$ 39                   |
| 49. Door-lock                    | 1694 $\pm$ 302                 | <b>1973<math>\pm</math>160</b> | 1359 $\pm$ 262                 | 1427 $\pm$ 289                 | 995 $\pm$ 303                 | 821 $\pm$ 243                   | 960 $\pm$ 149   | 1358 $\pm$ 445                 | 1573 $\pm$ 168                 |
| 50. Door-unlock                  | <b>1898<math>\pm</math>158</b> | 1792 $\pm$ 225                 | 1721 $\pm$ 132                 | 1870 $\pm$ 245                 | 769 $\pm$ 108                 | 1880 $\pm$ 426                  | 1374 $\pm$ 537  | 1707 $\pm$ 324                 | 1627 $\pm$ 169                 |
| Test mean                        | 839 $\pm$ 74                   | <b>894<math>\pm</math>27</b>   | 786 $\pm$ 69                   | 793 $\pm$ 49                   | 663 $\pm$ 100                 | 658 $\pm$ 96                    | 506 $\pm$ 122   | 762 $\pm$ 40                   | 768 $\pm$ 63                   |

## 575 D.2 Learning Curves

576 In Figures 6 through 9, the mean training and test success rates are represented by solid and dashed  
 577 lines respectively, with the shaded region indicating the 95% confidence interval. All results are  
 578 compiled from 8 random seeds. The data corresponding to the final training steps in these plots  
 579 (250M steps for ML-10 and 400M steps for ML-45) are used to present the main results in Table 1.

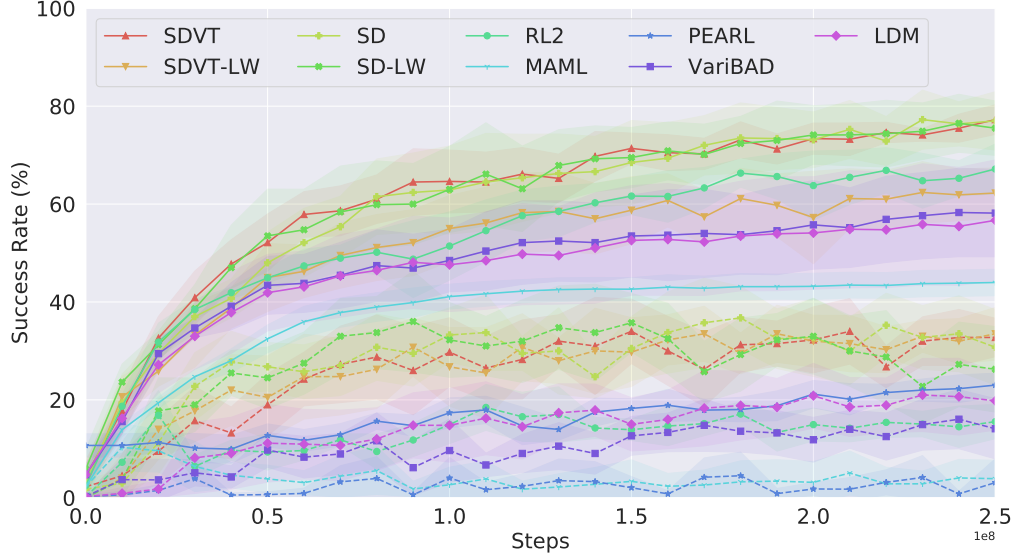

Figure 6: Learning curve on ML-10 – success rate.

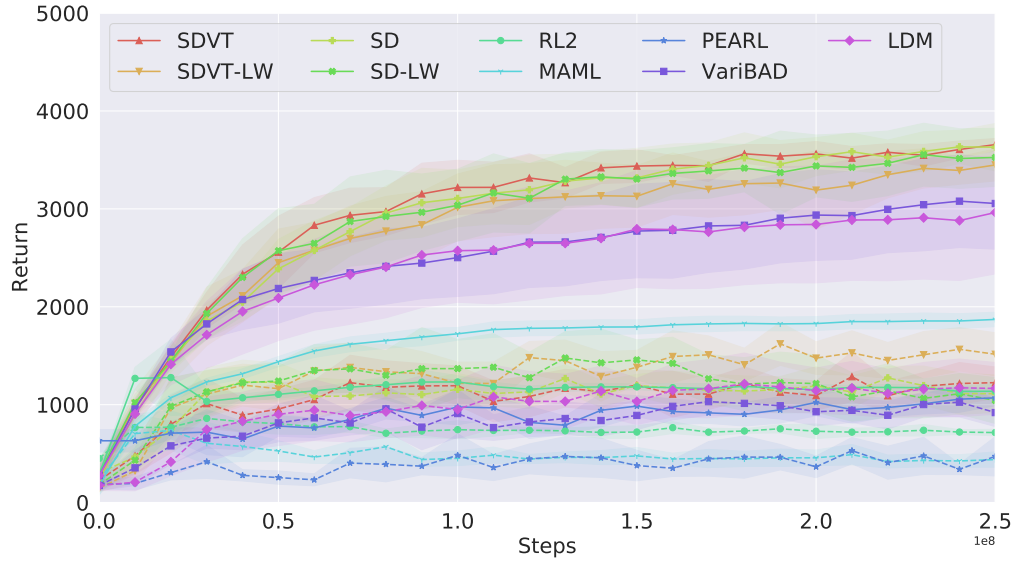

Figure 7: Learning curve on ML-10 – return.



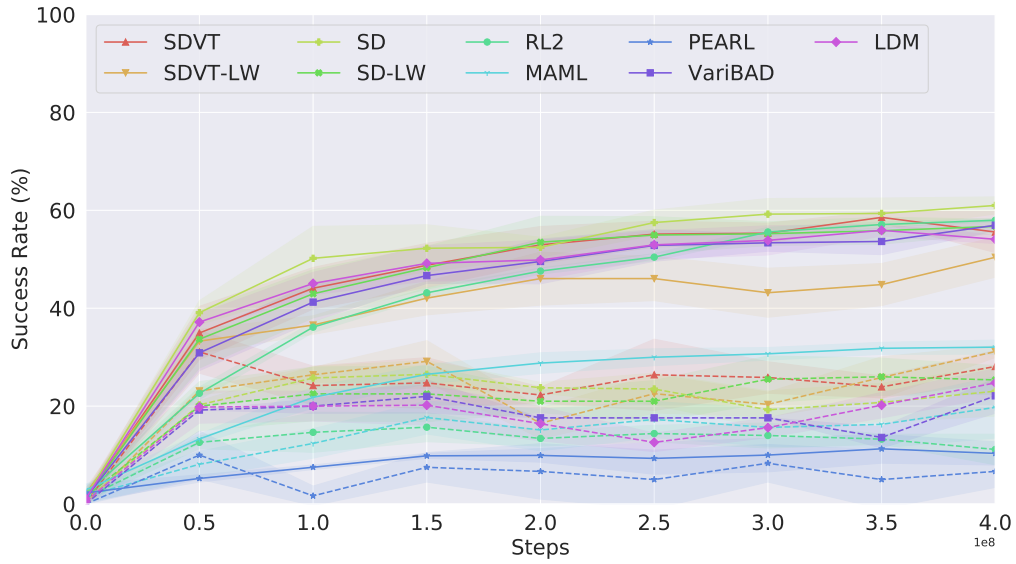

Figure 8: **Learning curve on ML-45 – success rate.**

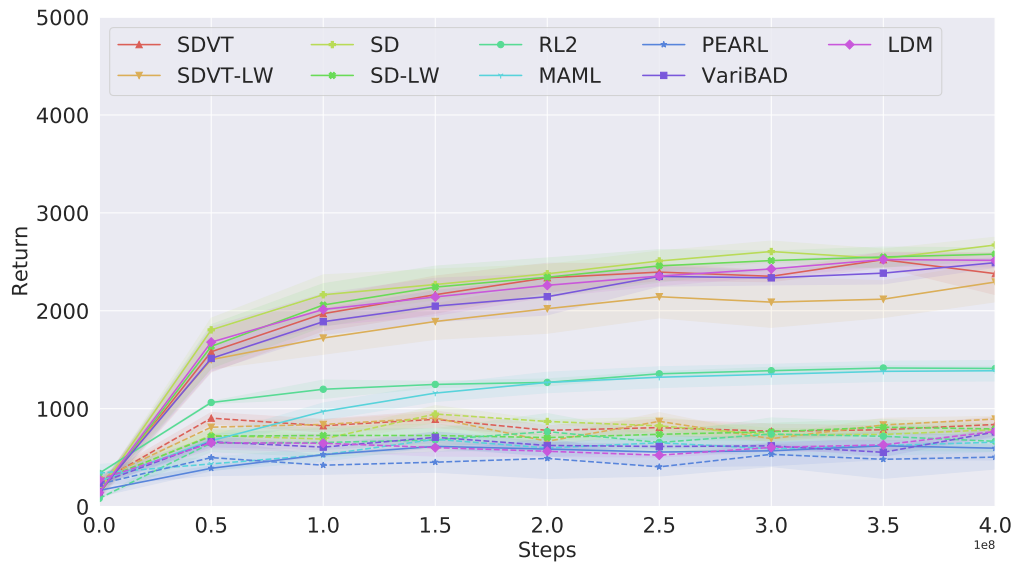

Figure 9: **Learning curve on ML-45 – return.**

### 580 D.3 Subtask Compositions Learned over Training

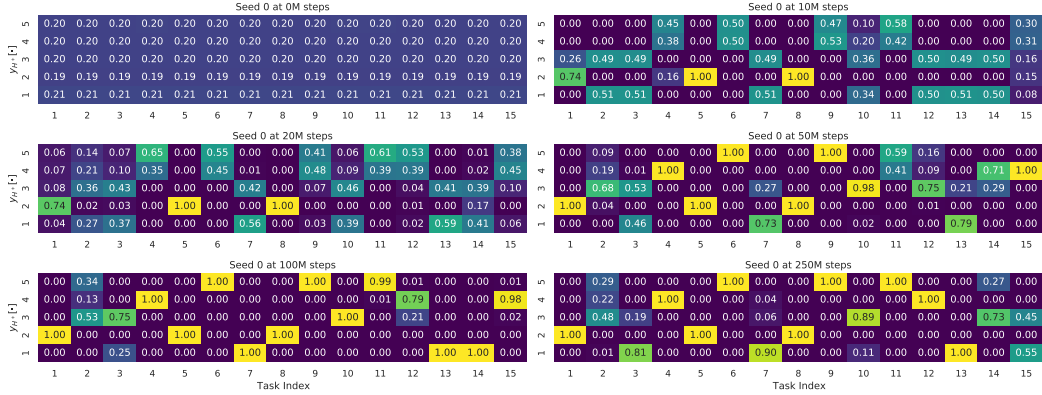

(a) SDVT-LW ( $K=5, \alpha_c=0.5, \alpha_o=0.0$ ).

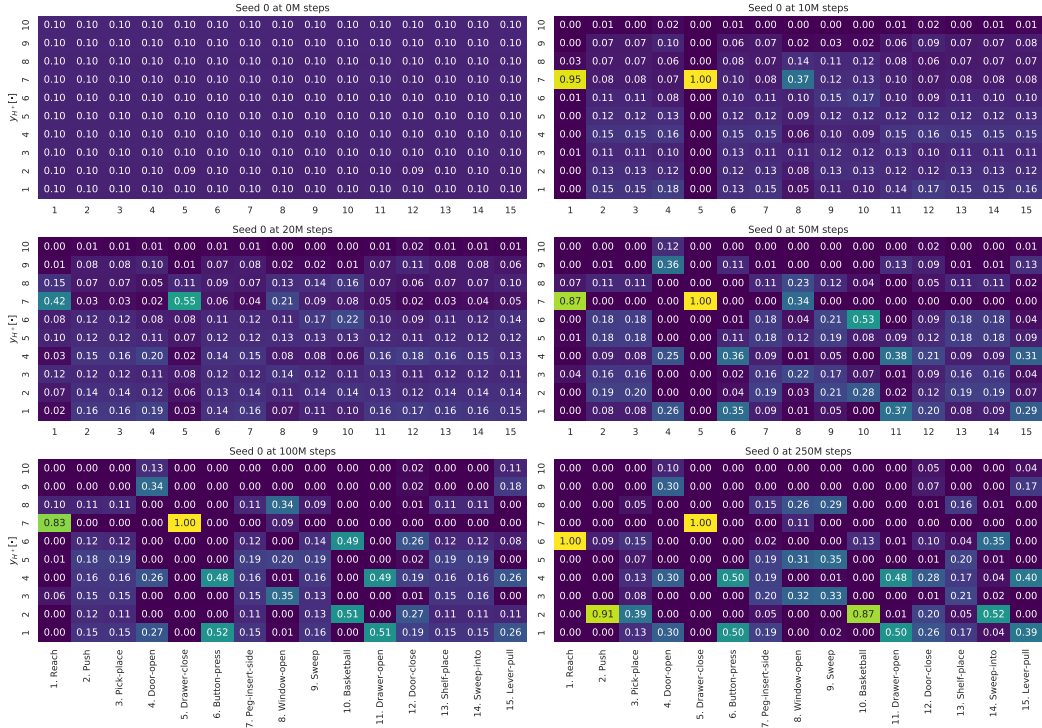

(b) SDVT ( $K=10, \alpha_c=1.0, \alpha_o=1.0$ ).

**Figure 10: Subtask compositions learned over training.** We visualize the development of subtask compositions for (a) SDVT-LW and (b) SDVT during training on ML-10. Similar to Figure 4, each column represents the terminal subtask composition ( $y_{H+}$ ) averaged across 50 parametric variants. (a) As training progresses, subtask compositions of (4) “Door-open” and (12) “Door-close” merge due to shared transition dynamics, which may cause the “Door-close” policy to keep the door open during testing without virtual training, underscoring the crucial role that virtual training can play in these scenarios. (b) With occupancy regularization, as the training progresses, the decomposition process prioritizes occupying lower indices over higher ones in the subtask compositions.

## 581 D.4 Subtask Compositions of all Seeds

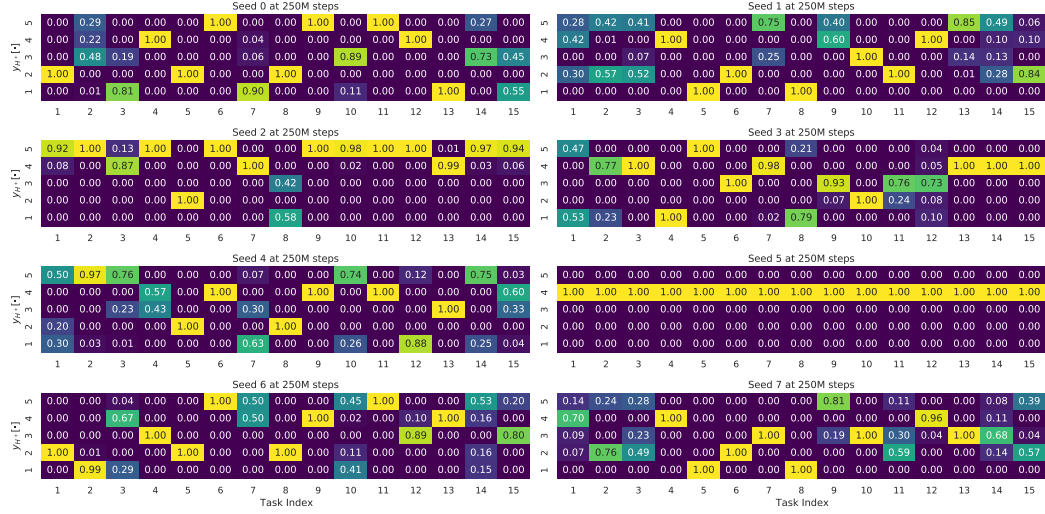

(a) SDVT-LW ( $K = 5, \alpha_c = 0.5, \alpha_o = 0.0$ ).

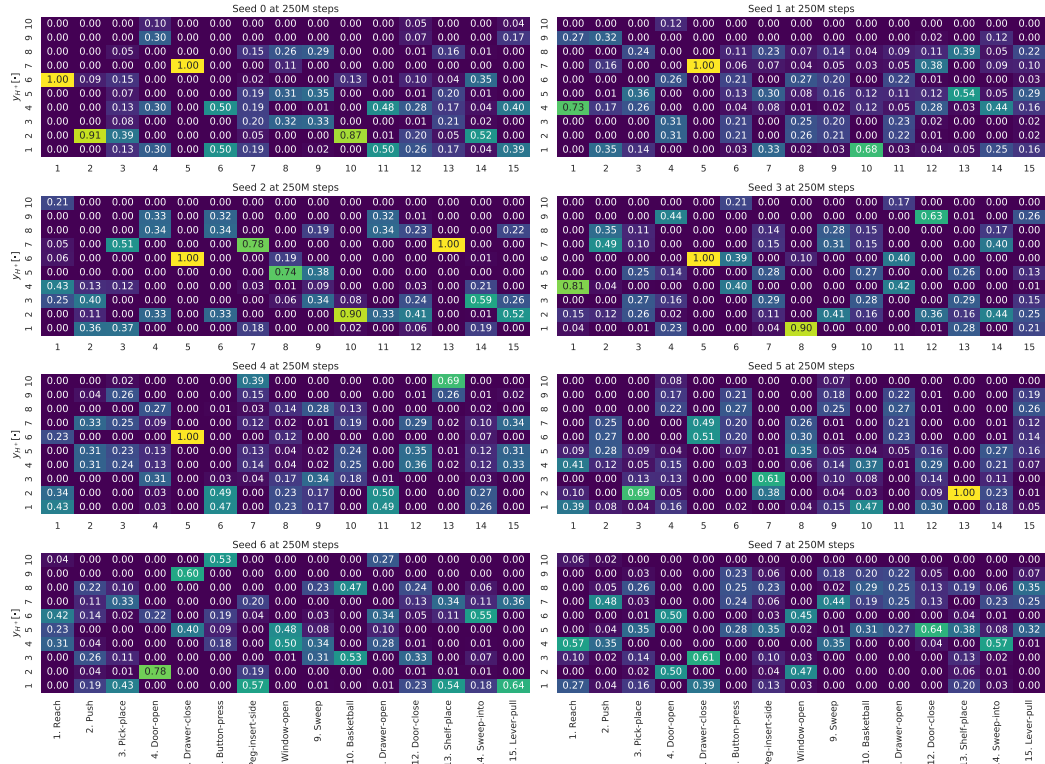

(b) SDVT ( $K = 10, \alpha_c = 1.0, \alpha_o = 1.0$ ).

Figure 11: **Subtask compositions of all seeds.** We visualize the subtask compositions of (a) SDVT-LW and (b) on ML-10 after 250M training steps for all seeds. Decomposition processes differ among random seeds due to varying initialization and sample tasks during meta-training. One subtask can be interpreted as a combination of multiple subtasks and vice versa, depending on the seed and the dimension  $K$ . We rarely have a collapse to a single Gaussian as in (a) Seed 5, which lowers the average performance. (b) With occupancy regularization, we find that the 10th element of the composition is rarely occupied, whereas the first element is occupied by many tasks.

## E Ablation Results

In order to confirm the source of the gain obtained from the proposed method, we conduct an extensive ablation study based on SDVT and SDVT-LW on ML-10.

### E.1 Occupancy Regularization

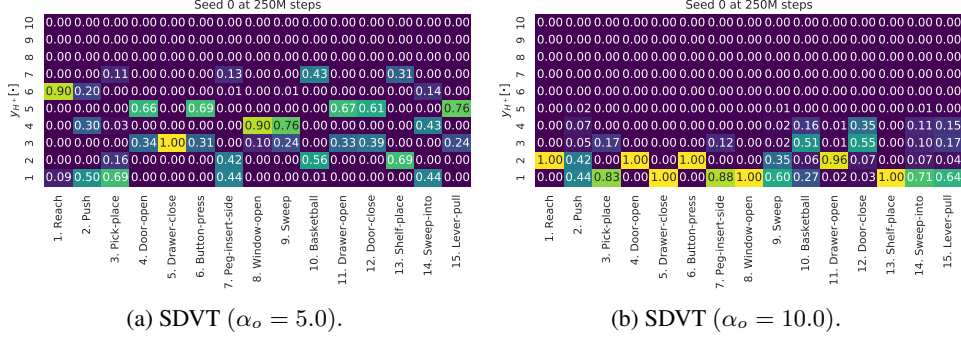

Figure 12: **Occupancy ablation.** We report the learned subtask compositions of SDVT ( $K = 10, \alpha_c = 1.0$ ) for different occupancy coefficients analogous to Figure 4a.

Figures 4a and 12 indicate that our occupancy regularization effectively constrains the use of higher indices as intended. We fix the default choice of  $\alpha_o = 1.0$  that we found to work well on ML-10. Our default SDVT with  $\alpha_o = 1.0$  scores a test success rate of 32.8%, which scored the best among  $\alpha_o \in \{0.0, 5.0, 10.0\}$  that scored 22.8%, 25.5%, and 21.0%, respectively.

### E.2 Dropout and Dispersion

Table 10: **Ablation results.** We report the mean success rate (%) and the difference caused by the changes made from the default SDVT-LW ( $K = 5, \alpha_c = 0.5, \alpha_o = 0.0$ ) on ML-10 in parenthesis.

| SDVT-LW     | without         |                 | $K$            |                 |                 | $\alpha_c$      |                 |                 |
|-------------|-----------------|-----------------|----------------|-----------------|-----------------|-----------------|-----------------|-----------------|
|             | Dropout         | Dispersion      | 3              | 7               | 10              | 0.1             | 1.0             | 2.0             |
| ML-10 Train | 65.6<br>(+3.5)  | 73.0<br>(+10.9) | 60.1<br>(-2.0) | 69.5<br>(+7.4)  | 70.8<br>(+8.7)  | 59.8<br>(-2.3)  | 70.3<br>(+8.2)  | 66.3<br>(+4.2)  |
| ML-10 Test  | 16.5<br>(-16.9) | 21.5<br>(-11.9) | 25.0<br>(-8.4) | 22.0<br>(-11.4) | 21.1<br>(-12.3) | 20.5<br>(-12.9) | 16.1<br>(-17.3) | 17.9<br>(-15.5) |

Table 10 demonstrates the significant roles played by both dropout and dispersion in generating extrapolated dynamics during virtual training, thereby enhancing the test success rate. As outlined in Appendix E.1 of the LDM paper [33], virtual training without dropout does not exhibit a significant improvement due to decoder overfitting on the state and action inputs of the training tasks. In fact, virtual training without dropout can even lead to a decrease in test performance.

However, it is important to note that these factors are not the primary contributors to the empirical gains of our method. Dropout is specifically essential for virtual training, but not necessarily for other methods that do not employ virtual training, such as VariBAD and RL2 (as discussed in Appendix E.2 of the LDM paper). We verified this in our ML-10 experiment using VariBAD with dropout. The inclusion of dropout marginally improves the training success rate of vanilla VariBAD from 58.2% to 63.0% and the test success rate from 14.1% to 16.5%. However, the performance enhancement achieved through dropout is not as substantial for VariBAD as it is for SDVT-LW’s virtual training.

### E.3 Decomposition Distribution

Table 10 emphasizes the significance of hyperparameters such as subtask dimension  $K$  and categorical coefficient  $\alpha_c$  in determining subtask compositions. It is crucial to carefully set these hyperparameters

based on the number of training tasks and their correlations. In our lightweight (LW) approach, we have selected  $K = 5$  and  $\alpha_c = 0.5$ , which effectively distributes subtasks across the ML-10 tasks. When  $\alpha_c$  is set to a small value, task classification collapses into a few subtasks, as depicted in Figure 4b. Conversely, with a large value of  $\alpha_c$ , the entropy of the composition is maximized, and all tasks exhibit a uniform probability distribution, as illustrated in Figure 4d. However, it is noteworthy that SDVT-LW outperforms VariBAD and LDM in test success rate, regardless of the specific values chosen for  $K$ , such as  $K = 3, 7, 10$ . To alleviate the burden of hyperparameter tuning in our LW methods, we introduce the occupancy regularization.

#### E.4 Number of parameters

Table 11: **Number of parameters and success rates.** We report the number of parameters used by our methods and baselines. We demonstrate that our gain is not from the increased capacity.

| Methods                      | Number of Parameters |         |         |           | ML-10 Success Rate (%) |      |
|------------------------------|----------------------|---------|---------|-----------|------------------------|------|
|                              | Encoder              | Decoder | Policy  | Sum       | Train                  | Test |
| SDVT-LW                      | 1,047,455            | 174,821 | 235,401 | 1,457,677 | 62.1                   | 33.4 |
| SD-LW                        | 1,047,455            | 25,637  | 235,401 | 1,308,493 | 75.5                   | 26.2 |
| LDM                          | 502,580              | 25,577  | 202,249 | 730,406   | 56.7                   | 19.8 |
| VariBAD                      | 251,290              | 25,577  | 202,249 | 479,116   | 58.2                   | 14.1 |
| VariBAD (hidden $\times 2$ ) | 894,362              | 25,577  | 663,305 | 1,583,244 | 62.4                   | 12.0 |

Table 11 indicates that SDVT-LW employs 3 and 2 times more parameters compared to VariBAD and LDM, respectively. The encoder of our method has more parameters than VariBAD due to the added categorical layer. The decoder of SDVT-LW includes the parameters of the dispersion layers. However, we find that the model’s improvement is not mainly attributed to the increased capacity. Generally, a larger capacity does not necessarily guarantee better generalization. While selecting encoder (GRU) and policy hidden sizes, we experimented with 128, 256, and 512, discovering that 256 works best for all task-inference methods (LDM, SD only, and SDVT). Notably, VariBAD with hidden dimensions of 512 possesses more parameters than SDVT but exhibits an even lower test success rate than the vanilla VariBAD.

#### E.5 Conditioning policy on belief

Table 12: **Masking contexts.** We present the success rates (%) on ML-10, achieved by ablating the contexts fed into the policy, to illustrate the effective utilization of learned contexts by the policy.

|             | SDVT-LW | SDVT-LW<br>masked ( $\omega_{\phi_y}$ ) | SDVT-LW<br>masked ( $\mu_{\phi_z}, \sigma_{\phi_z}$ ) | SDVT-LW<br>masked ( $\omega_{\phi_y}, \mu_{\phi_z}, \sigma_{\phi_z}$ ) |
|-------------|---------|-----------------------------------------|-------------------------------------------------------|------------------------------------------------------------------------|
| ML-10 Train | 62.1    | 58.6                                    | 36.9                                                  | 34.8                                                                   |
| ML-10 Test  | 33.4    | 33.6                                    | 25.8                                                  | 24.5                                                                   |

We employ VariBAD’s stop gradient architecture to avoid the instability that may arise from the concurrent training of policy and ELBO objectives. This may lead to a potential vulnerability where the policy neglects contexts. However, in Meta-World, identical observations could belong to different tasks, such as “Reach” and “Pick-place.” Therefore, the agent must rely on the inferred context. To confirm this, we evaluate SDVT by masking either ( $\omega_{\phi_y}$ ) or ( $\mu_{\phi_z}, \sigma_{\phi_z}$ ) in the policy input.

Our findings reveal that masking the contexts severely damages the training and test success rates. Especially, masking the Gaussian parameters of  $z$  is more critical than masking the categorical parameter of  $y$ . However, this does not suggest that  $y$  is redundant, given that the continuous context  $z$  is trained to include  $y$ ’s information. Interestingly, the test success rate, with all contexts masked (i.e., solely relying on the current state  $s_t$ ), achieves a success rate of 24.5%, surpassing all baseline scores. Although the policy does not directly employ the context learned by the GMVAE, it can still be effectively trained in the imaginary task generated by the learned GMVAE to prepare for tests with unseen compositions of subtasks.
